# Supplementary material
Source: publisher figshare collection journal article supplement (https://sage.figshare.com/ndownloader/files/20366985)
Supplement: Supplementary file 1 [file 20366985]

## Supplementary Figure S1

Proportion of deaths by group, including unusable and insufficiently specified codes, Greenland, 2006-15

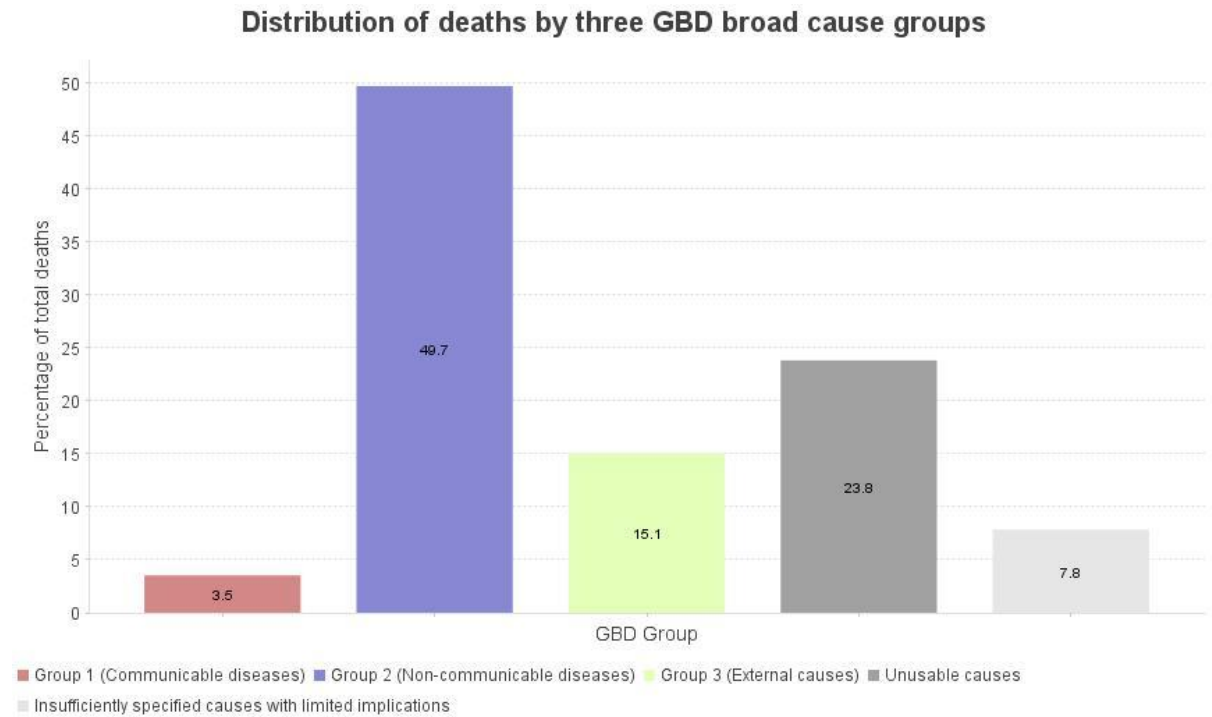

Denmark / Greenland 2006-15, 2015
